# Supplementary material for: ATM regulation of IL-8 links oxidative stress to cancer cell migration and invasion
Source: eLife journal article supplement (doi:10.7554/elife.07270), 2015-06-01
Supplement: supp [file elife-07270-supp-v1.zip]

Figure 1-figure supplement 1

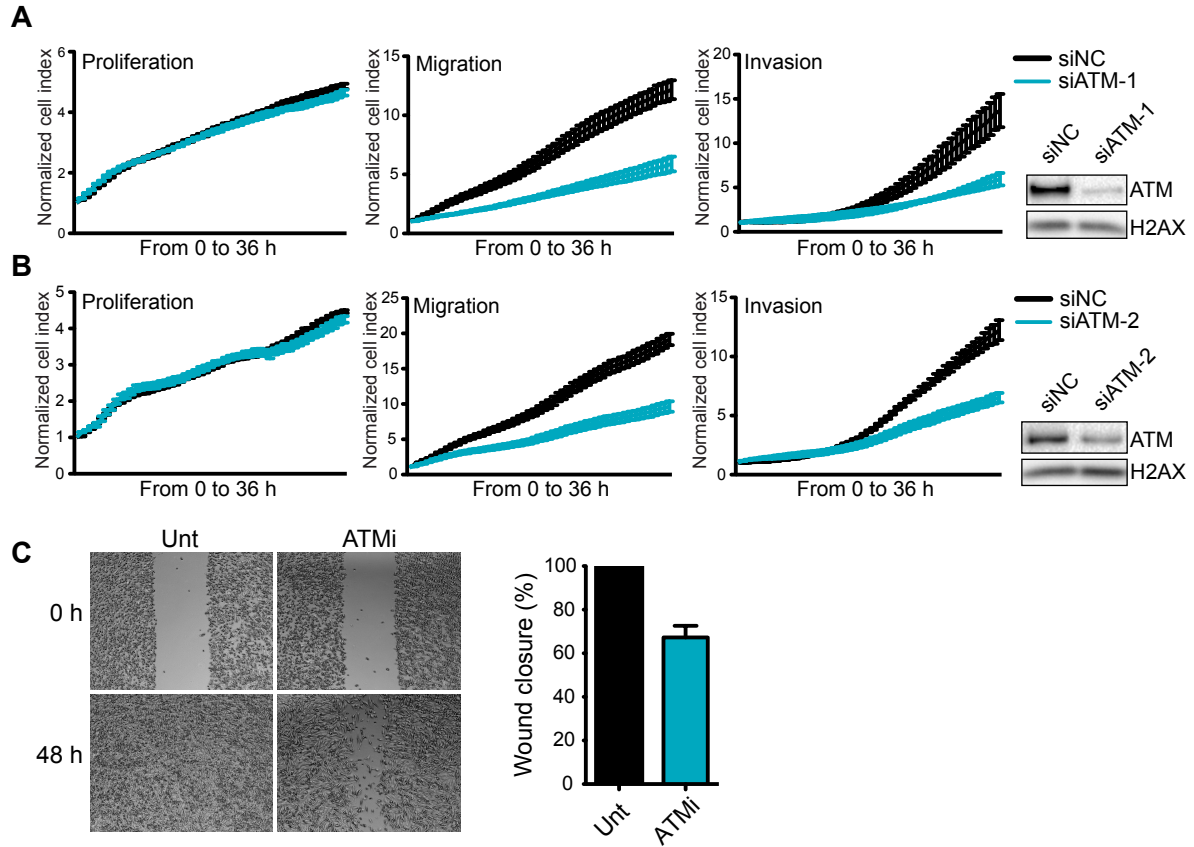

**Figure 1—figure supplement 1.** Knockdown of ATM impairs cell migration and invasion. **(A-B)** ATM depletion by two independent siRNAs reduces migration and invasion in MDA-MB-231 cells. Proliferation, migration and invasion of cells in siATM-1 **(A)** and siATM-2 **(B)** compared to siNC control cells were analyzed as in Figure 1G. Western blot of ATM depletion for each individual siRNA are shown. H2AX is loading control. **(C)** Treatment with ATM kinase inhibitor reduces cell migration compared to untreated cells. Cells were analyzed as in Figure 1E. ATMi - KU-55933.
