# Supplementary material for: ATM regulation of IL-8 links oxidative stress to cancer cell migration and invasion
Source: eLife journal article supplement (doi:10.7554/elife.07270), 2015-06-01
Supplement: supp [file elife-07270-supp-v1.zip]

Figure 6-figure supplement 2

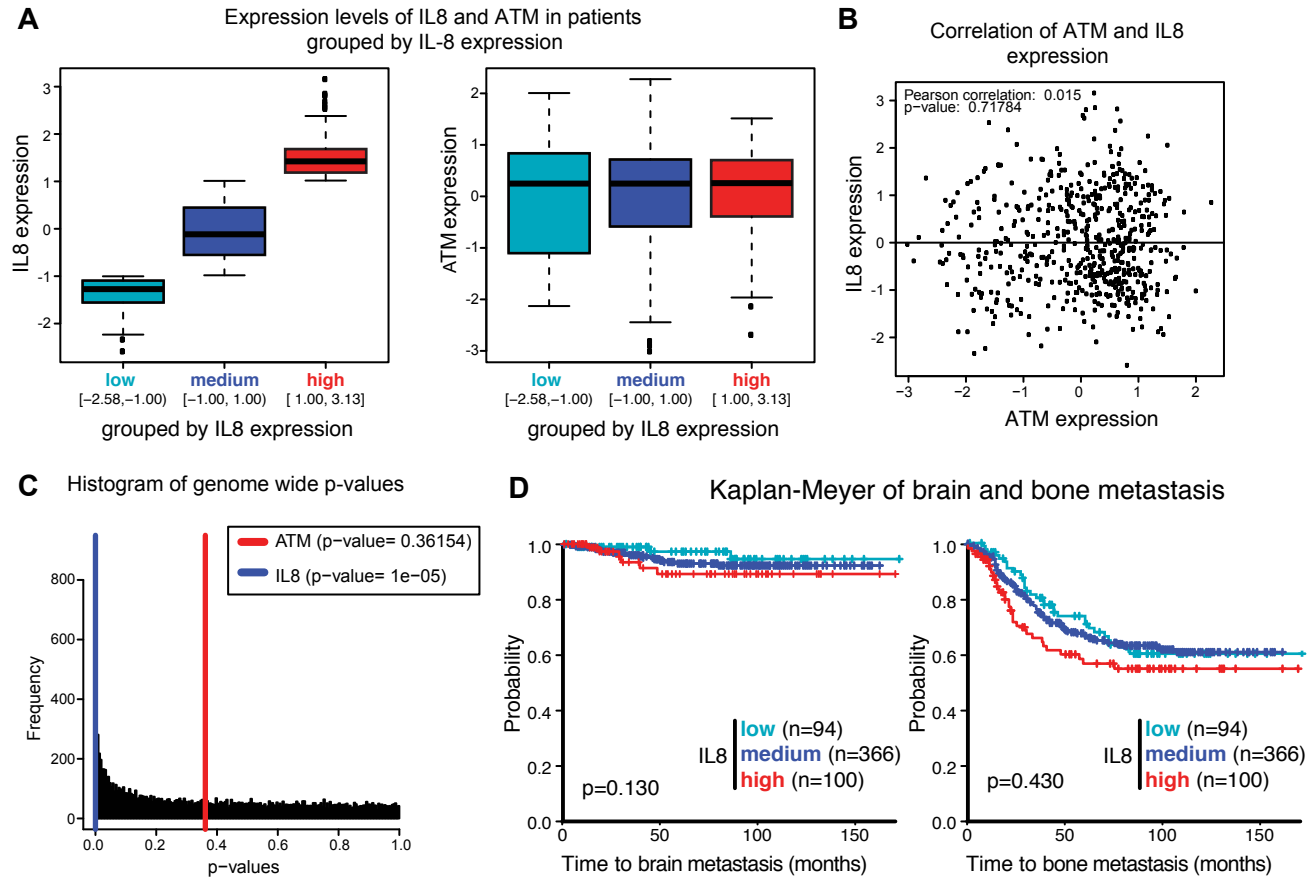

**Figure 6—figure supplement 2.** Analysis of gene expression data from breast cancer patients. **(A)** Boxplot of IL8 (left panel) and ATM (right panel) expression in patients grouped according to IL8 expression (see Figure 6F). **(B)** Pearson analysis of correlation between ATM and IL8 in the 560 patient samples used in the analysis. **(C)** Histogram of p-values of a Univariate Cox proportional hazard regression for the expression of all genes in the microarray. In color we show the p-values obtained with IL8 expression (0.0033 percentile) and ATM expression (0.4676 percentile). **(D)** Kaplan-Meier plots of probability of brain and bone metastasis free survival in 560 breast cancer patients based on IL8 expression levels.
