# Supplementary material for: ATM regulation of IL-8 links oxidative stress to cancer cell migration and invasion
Source: eLife journal article supplement (doi:10.7554/elife.07270), 2015-06-01
Supplement: supp [file elife-07270-supp-v1.zip]

Archive with 15 entries (15 files):
- elife_poa_e07270_Figure_2_figure_supplement_1.pdf
- elife_poa_e07270_Supplementary_File_2.docx
- elife_poa_e07270_Video_4.avi
- elife_poa_e07270_Figure_6_figure_supplement_2.pdf
- elife_poa_e07270_Figure_5_figure_supplement_1.pdf
- elife_poa_e07270_Figure_4_figure_supplement_2.pdf
- elife_poa_e07270_Supplementary_File_1.xlsx
- elife_poa_e07270_Video_5.avi
- elife_poa_e07270_Video_1.avi
- elife_poa_e07270_Figure_6_figure_supplement_1.pdf
- elife_poa_e07270_Video_2.avi
- elife_poa_e07270_Video_3.avi
- elife_poa_e07270_Figure_1_figure_supplement_1.pdf
- elife_poa_e07270_Figure_3_figure_supplement_1.pdf
- elife_poa_e07270_Figure_4_figure_supplement_1.pdf
