# Supplementary material for: ATM regulation of IL-8 links oxidative stress to cancer cell migration and invasion
Source: eLife journal article supplement (doi:10.7554/elife.07270), 2015-06-01
Supplement: supp [file elife-07270-supp-v1.zip]

Figure 5-figure supplement 1

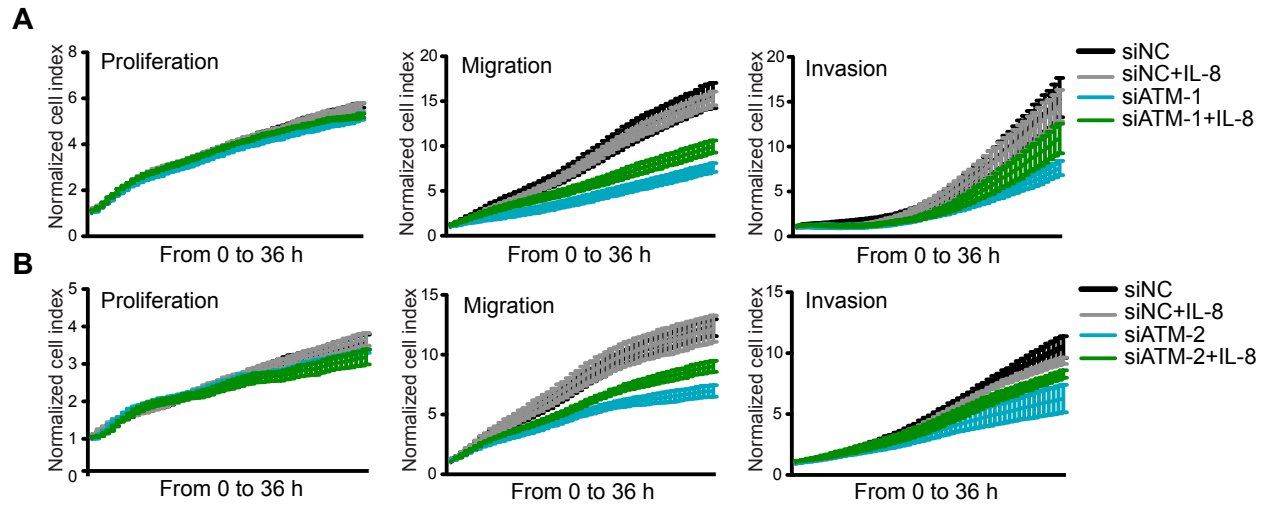

**Figure 5—figure supplement 1.** Exogenous addition of IL-8 rescues migration and invasion defects in ATM-depleted cells. **(A-B)** IL-8 addition restores impaired migration and invasion for cells treated with independent siATM-1 **(A)** and siATM-2 **(B)** compared to siNC control cells. Experiments performed as in Figures 5F and 5G (mean  $\pm$  s.e.m.,  $n=3$ ).
