# Supplementary material for: ATM regulation of IL-8 links oxidative stress to cancer cell migration and invasion
Source: eLife journal article supplement (doi:10.7554/elife.07270), 2015-06-01
Supplement: supp [file elife-07270-supp-v1.zip]

Figure 6-figure supplement 1

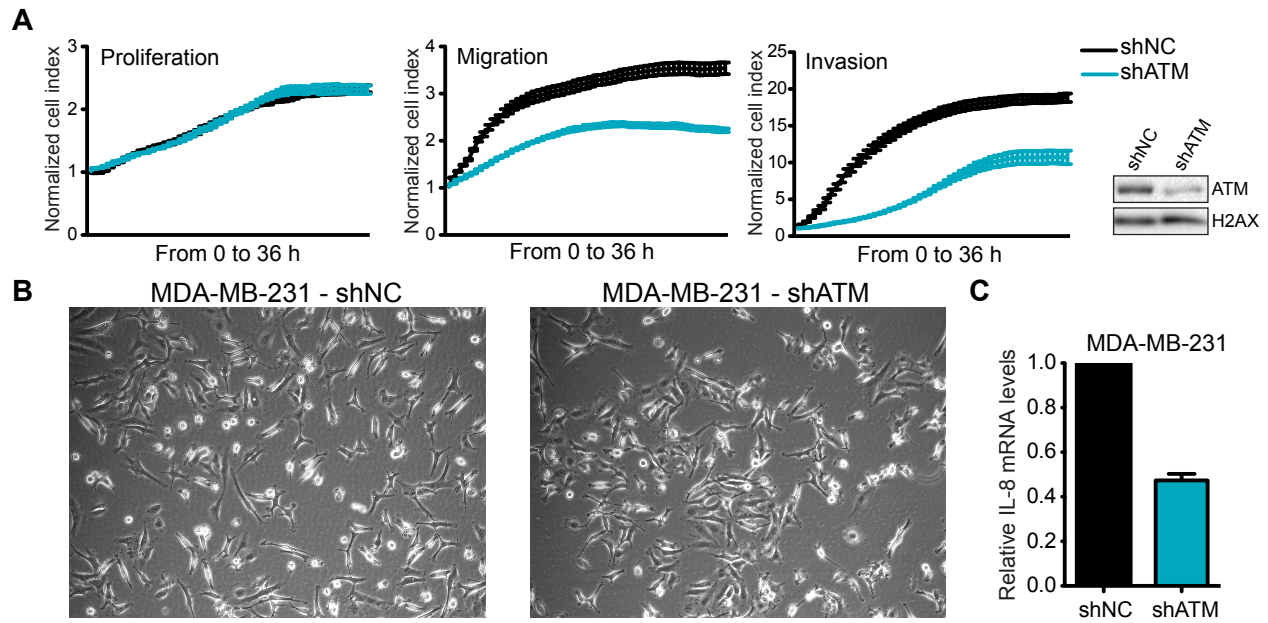

**Figure 6—figure supplement 1.** ATM is required for cell motility and IL-8 expression. **(A)** shATM cells exhibit defects in cell migration and invasion but not proliferation compared to shNC cells. Experiments were performed as in Figure 1G. Western blot showed ATM depletion in shATM cells compared to shNC cells. **(B)** Morphology of shNC and shATM MDA-MB-231 cells. **(C)** IL-8 expression is reduced in shATM cells compared to shNC cells.
