# Supplementary material for: ATM regulation of IL-8 links oxidative stress to cancer cell migration and invasion
Source: eLife journal article supplement (doi:10.7554/elife.07270), 2015-06-01
Supplement: supp [file elife-07270-supp-v1.zip › elife_poa_e07270_Figure_2_figure_supplement_1.pdf]

Figure 2-figure supplement 1

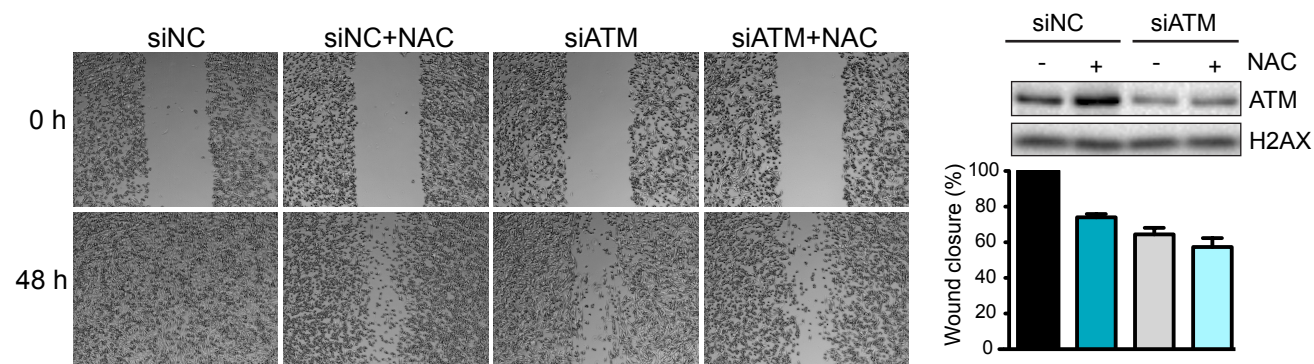

**Figure 2—figure supplement 1.** Inhibition of oxidative stress reduces cell migration and invasion. ROS inhibitor NAC reduces cell migration to a similar extent as ATM-depletion. siATM and siNC control MDA-MB-231 cells were either untreated or treated with NAC and analyzed as in Figure 2D for cell migration. Right panel: Western blot of ATM depletion and quantification of cell migration for each sample.
