# Supplementary material for: ATM regulation of IL-8 links oxidative stress to cancer cell migration and invasion
Source: eLife journal article supplement (doi:10.7554/elife.07270), 2015-06-01
Supplement: supp [file elife-07270-supp-v1.zip › elife_poa_e07270_Figure_3_figure_supplement_1.pdf]

Figure 3-figure supplement 1

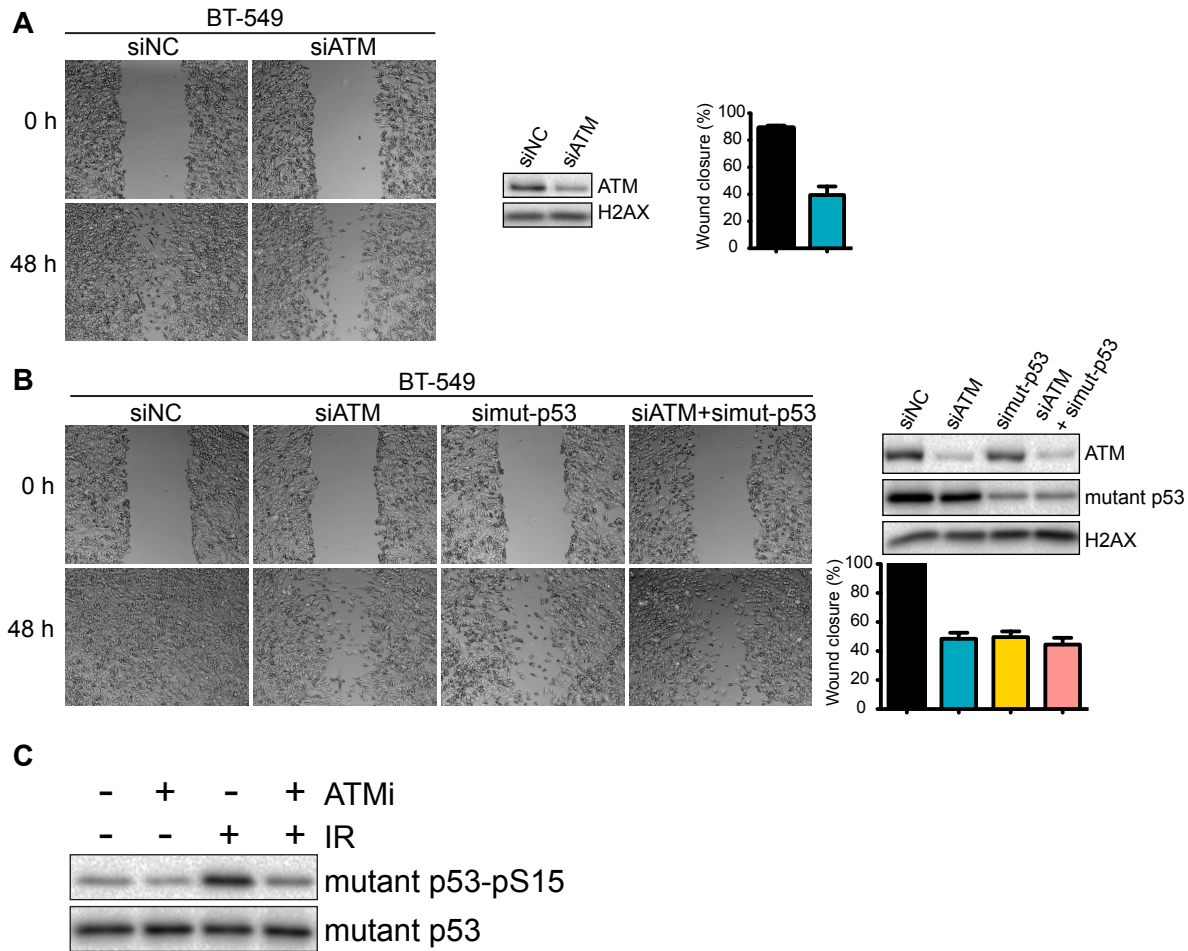

**Figure 3—figure supplement 1.** Analysis of ATM and mutant p53 functions in human breast cancer cells. **(A)** ATM depletion impairs cell migration. Cells transfected with indicated siRNA were analyzed by wound-healing assays to determine cell motility. Right: Quantification of wound healing and ATM siRNA knockdown efficiency. **(B)** Reduction of ATM and/or p53 reduces cell migration. Cells were treated and analyzed with the indicated siRNAs as Figure 3A. Quantification of wound healing and depletion analysis is in right. **(C)** Treatment of MDA-MB-231 cells with ATM kinase inhibitor reduces mutant p53-pS35 compared to untreated cells. Experiments were performed as in Figure 1F.
