# Supplementary material for: ATM regulation of IL-8 links oxidative stress to cancer cell migration and invasion
Source: eLife journal article supplement (doi:10.7554/elife.07270), 2015-06-01
Supplement: supp [file elife-07270-supp-v1.zip › elife_poa_e07270_Figure_4_figure_supplement_1.pdf]

Figure 4-figure supplement 1

Gene ontology (GO) analysis

**A**

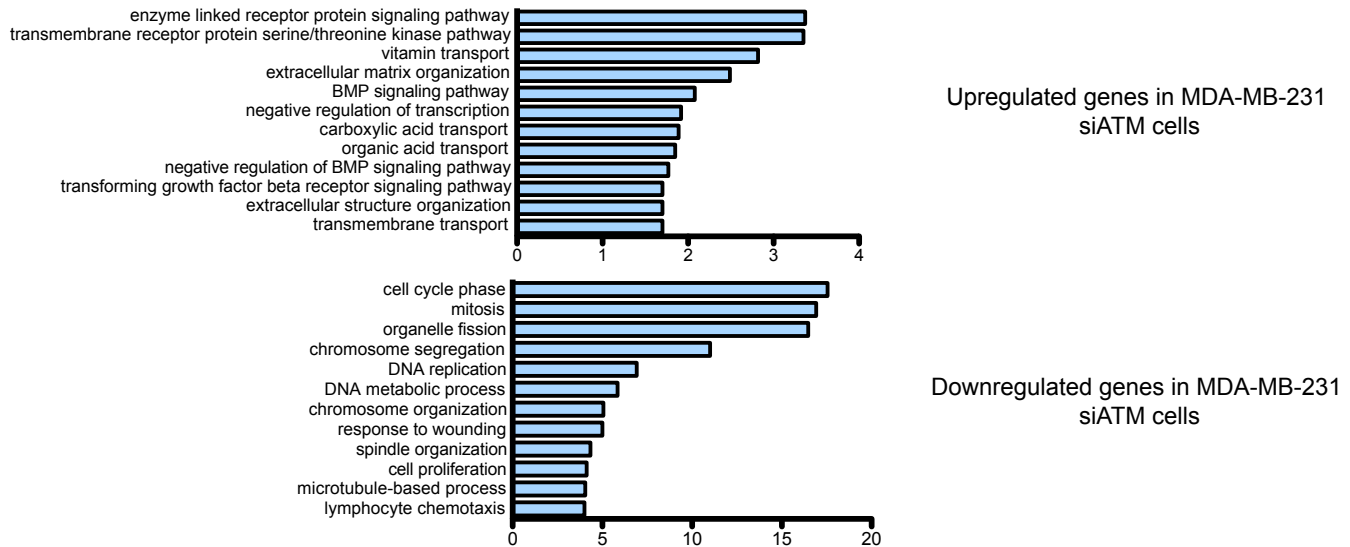

**B**

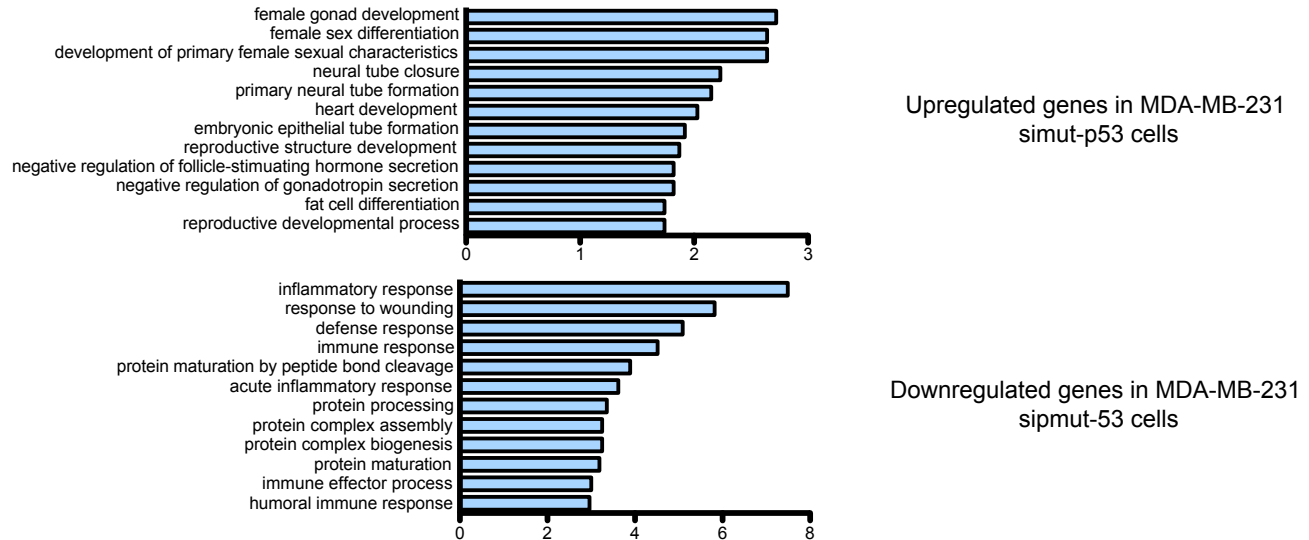

**C**

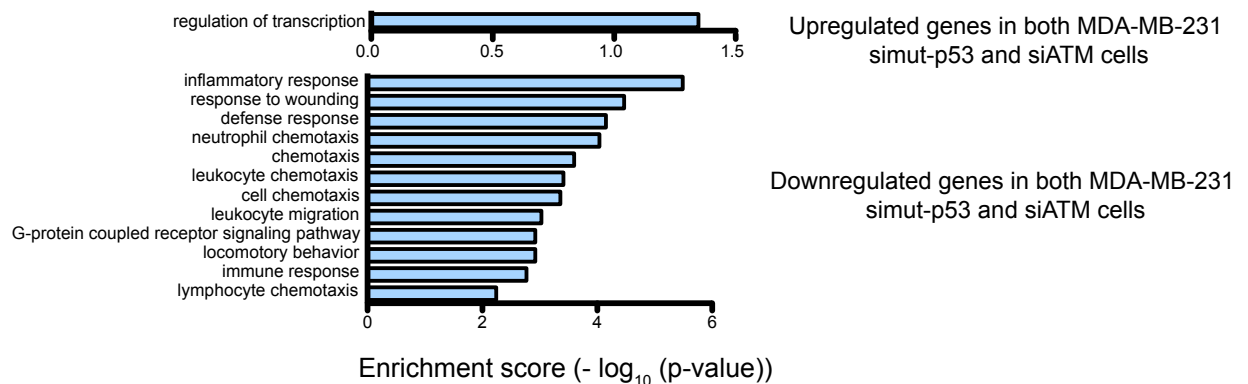

**Figure 4—figure supplement 1.** Gene ontology analysis of ATM and mutant p53 regulated genes in MDA-MB-231 cells. (A-C) Functional classification of regulated genes in MDA-MB-231 from siATM (A), simut-p53 (B) and genes regulated similarly in both siATM and simut-p53 by more than 1.5 fold (C). Gene ontology analysis was analyzed using the “Functional Annotation Tool” in DAVID (<http://david.abcc.ncifcrf.gov/home.jsp>) and biological process terms are shown. Gene ontology pathways are shown for the upregulated genes (top) and downregulated genes (bottom). X-axis plots  $-\log_{10}$  p-values obtained by the gene ontology analysis. The top twelve pathways are shown for each data set.
