# Supplementary material for: ATM regulation of IL-8 links oxidative stress to cancer cell migration and invasion
Source: eLife journal article supplement (doi:10.7554/elife.07270), 2015-06-01
Supplement: supp [file elife-07270-supp-v1.zip › elife_poa_e07270_Figure_4_figure_supplement_2.pdf]

Figure 4-figure supplement 2

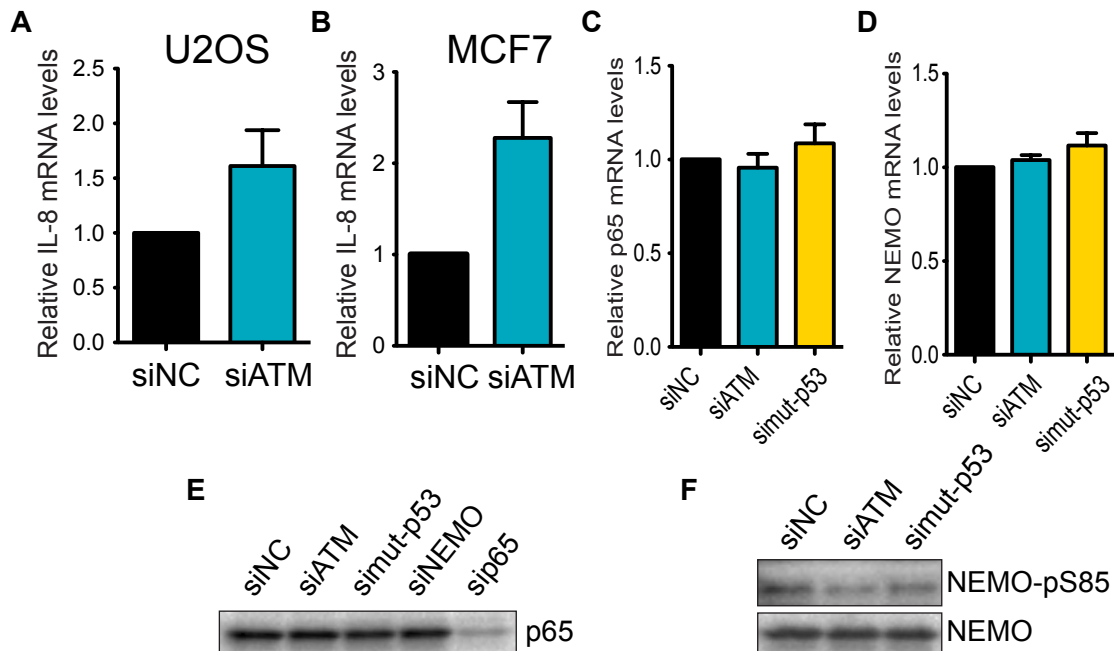

**Figure 4—figure supplement 2.** Regulation of IL-8 and NF- $\kappa$ B by ATM and p53. ATM promotes IL-8 mRNA expression in the context of mutant p53 (**A-B**) Depletion of ATM in WT p53-containing cancer cell lines (**A**) U2OS or (**B**) MCF7 did not reduce IL-8 mRNA levels. (**C-D**) Depletion of ATM or mutant p53 does not reduce the mRNA levels of (**C**) p65 or (**D**) NEMO. (**E**) p65 protein levels are not reduced upon depletion of ATM, mutant p53 or NEMO. sip65 acts as a control. (**F**) Depletion of ATM or mutant p53 results in reduced phosphorylation of NEMO at Ser-85. All experiments were performed in MDA-MB-231 cells except **A** and **B**. Experiments were performed as in Figure 4.
