# Supplementary material for: ATM regulation of IL-8 links oxidative stress to cancer cell migration and invasion
Source: eLife journal article supplement (doi:10.7554/elife.07270), 2015-06-01
Supplement: supp [file elife-07270-supp-v1.zip › elife_poa_e07270_Supplementary_File_1.xlsx]

## Sheet: 1A
Supplementary File 1A Differentially expressed genes in siATM MDA-MB-231 cells.
Transcript Cluster ID	Fold Change	Gene Symbol	Description
16683377	4.78	ID3	inhibitor of DNA binding 3, dominant negative helix-loop-helix protein
16906419	3.88	SLC40A1	solute carrier family 40 (iron-regulated transporter), member 1
17059804	3.09	CALCR	calcitonin receptor
17038034	3.06	PSORS1C1	psoriasis susceptibility 1 candidate 1
16738803	2.96	TCN1	transcobalamin I (vitamin B12 binding protein, R binder family)
16899109	2.74	SLC4A5	solute carrier family 4, sodium bicarbonate cotransporter, member 5
16855781	2.67	DSEL	dermatan sulfate epimerase-like
16831928	2.66	FBXW10	F-box and WD repeat domain containing 10
16768270	2.6	KITLG	KIT ligand
16980974	2.6	FAM198B	family with sequence similarity 198, member B
16962911	2.5	LRRC15	leucine rich repeat containing 15
16904278	2.49	DPP4	dipeptidyl-peptidase 4
17006554	2.48	PSORS1C1	psoriasis susceptibility 1 candidate 1
16767513	2.46	TSPAN8	tetraspanin 8
16668997	2.45	OLFML3	olfactomedin-like 3
16837571	2.31	GPRC5C	G protein-coupled receptor, family C, group 5, member C
17000793	2.28	CD14	CD14 molecule
16743432	2.27	SESN3	sestrin 3
16857093	2.24	CREB3L3	cAMP responsive element binding protein 3-like 3
17110700	2.22	KCND1	potassium voltage-gated channel, Shal-related subfamily, member 1
17055501	2.21	AGR2	anterior gradient 2 homolog (Xenopus laevis)
17030550	2.17	PSORS1C1	psoriasis susceptibility 1 candidate 1
17051553	2.16	CPA4	carboxypeptidase A4
16943336	2.14	TMEM45A	transmembrane protein 45A
16703563	2.1	BAMBI	BMP and activin membrane-bound inhibitor homolog (Xenopus laevis)
16997721	2.1	SSBP2	single-stranded DNA binding protein 2
16779341	2.06	NEK5	NIMA (never in mitosis gene a)-related kinase 5
16841660	2.06	CDRT1	CMT1A duplicated region transcript 1
16956983	2.06	CBLB	Cbl proto-oncogene, E3 ubiquitin protein ligase B
17066921	2.05	ADAM28	ADAM metallopeptidase domain 28
16736821	2.04	LGR4	leucine-rich repeat containing G protein-coupled receptor 4
16769770	2.04	SELPLG	selectin P ligand
16781462	2.04	RN5S380	RNA, 5S ribosomal 380
17100201	2.04	CLIC3	chloride intracellular channel 3
16711001	2.02	CYP2E1	cytochrome P450, family 2, subfamily E, polypeptide 1
16895619	1.99	AGBL5-AS1	AGBL5 antisense RNA 1 (non-protein coding)
16815509	1.98	VASN	vasorin
16912362	1.97	ID1	inhibitor of DNA binding 1, dominant negative helix-loop-helix protein
17043843	1.97	TSPAN13	tetraspanin 13
17048738	1.96	BRI3	brain protein I3
16975506	1.95	ATP8A1	ATPase, aminophospholipid transporter (APLT), class I, type 8A, member 1
16681827	1.94	DHRS3	dehydrogenase/reductase (SDR family) member 3
16675398	1.91	CFH	complement factor H
17077331	1.9	PLAG1	pleiomorphic adenoma gene 1
16968521	1.89	MIR4451	microRNA 4451
16794548	1.88	DNAL1	dynein, axonemal, light chain 1
16839519	1.88	TLCD2	TLC domain containing 2
17018993	1.87	C6orf130	chromosome 6 open reading frame 130
16836021	1.86	ABCC3	ATP-binding cassette, sub-family C (CFTR/MRP), member 3
16899764	1.86	ST3GAL5	ST3 beta-galactoside alpha-2,3-sialyltransferase 5
16974830	1.86	PPARGC1A	peroxisome proliferator-activated receptor gamma, coactivator 1 alpha
16802232	1.84	SMAD6	SMAD family member 6
17108113	1.84	PLXNB3	plexin B3, SRSF protein kinase 3
16659637	1.83	CELA2B	chymotrypsin-like elastase family, member 2B
16843167	1.82	EVI2A	ecotropic viral integration site 2A
17080486	1.82	TNFRSF11B	tumor necrosis factor receptor superfamily, member 11b
17096166	1.82	HSD17B3	hydroxysteroid (17-beta) dehydrogenase 3
16683105	1.81	HSPG2	heparan sulfate proteoglycan 2
16928988	1.8	TCN2	transcobalamin II
16660822	1.79	C1orf130	chromosome 1 open reading frame 130
16841634	1.79	CDRT1	CMT1A duplicated region transcript 1
17050455	1.79	FOXP2	forkhead box P2
16690704	1.78	SLC16A4	solute carrier family 16, member 4 (monocarboxylic acid transporter 5)
16805474	1.76	ARRDC4	arrestin domain containing 4
16705199	1.75	ARID5B	AT rich interactive domain 5B (MRF1-like)
16760350	1.75	SCNN1A	sodium channel, non-voltage-gated 1 alpha subunit
16875026	1.75	ZNF616	zinc finger protein 616
16693976	1.74	MUC1	mucin 1, cell surface associated
17007853	1.74	ARMC12	armadillo repeat containing 12
16697219	1.73	RN5S72	RNA, 5S ribosomal 72
16701092	1.73	OPN3	opsin 3
16703036	1.73	PLXDC2	plexin domain containing 2
16846734	1.73	TOB1	transducer of ERBB2, 1
16984730	1.73	FST	follistatin
16705831	1.72	SLC29A3	solute carrier family 29 (nucleoside transporters), member 3
16763577	1.72	SLC38A4	solute carrier family 38, member 4
16787135	1.72	FLRT2	fibronectin leucine rich transmembrane protein 2
16814356	1.72	FAM195A	family with sequence similarity 195, member A
16820463	1.72	CDH3	cadherin 3, type 1, P-cadherin (placental)
16845537	1.72	HDAC5	histone deacetylase 5
17023377	1.72	RN5S217	RNA, 5S ribosomal 217
16734303	1.71	IFITM10	interferon induced transmembrane protein 10
16790115	1.71	RNASE1	ribonuclease, RNase A family, 1 (pancreatic)
16999321	1.71	ZNF608	zinc finger protein 608
16949264	1.7	LOC344887	NmrA-like family domain containing 1 pseudogene
17084838	1.7	RECK	reversion-inducing-cysteine-rich protein with kazal motifs
16687829	1.69	OMA1	OMA1 zinc metallopeptidase homolog (S. cerevisiae), disabled homolog 1 (Drosophila)
16733808	1.69	BET1L	blocked early in transport 1 homolog (S. cerevisiae)-like
16750974	1.69	AQP5	aquaporin 5
16778460	1.69	KBTBD7	kelch repeat and BTB (POZ) domain containing 7
16851914	1.69	ZNF397	zinc finger protein 397
16860414	1.69	PLEKHF1	pleckstrin homology domain containing, family F (with FYVE domain) member 1
16888865	1.69	GLS	glutaminase
16965162	1.69	CPEB2	cytoplasmic polyadenylation element binding protein 2
16698356	1.68	PIK3C2B	phosphoinositide-3-kinase, class 2, beta polypeptide
16713330	1.68	ZNF248	zinc finger protein 248
16873239	1.68	TRAPPC6A	trafficking protein particle complex 6A
16674604	1.67	MR1	major histocompatibility complex, class I-related
16979917	1.67	SLC7A11	solute carrier family 7 (anionic amino acid transporter light chain, xc- system), member 11
17087109	1.67	MIR27B	microRNA 27b, chromosome 9 open reading frame 3
16703301	1.66	THNSL1	threonine synthase-like 1 (S. cerevisiae)
16826760	1.66	PLLP	plasmolipin
16870956	1.66	ZNF91	zinc finger protein 91
16890519	1.66	DNAPTP3	histone demethylase UTY-like
16663284	1.65	CCDC30	coiled-coil domain containing 30
17048473	1.65	COL1A2	collagen, type I, alpha 2
17059955	1.65	PDK4	pyruvate dehydrogenase kinase, isozyme 4
17069550	1.65	ADHFE1	alcohol dehydrogenase, iron containing, 1
16713562	1.64	C10orf10	chromosome 10 open reading frame 10
16800061	1.64	CAPN3	calpain 3, (p94)
16837820	1.64	LLGL2	lethal giant larvae homolog 2 (Drosophila)
16971867	1.64	TMEM144	transmembrane protein 144
17026643	1.64	HCG17	HLA complex group 17 (non-protein coding)
17073146	1.64	PTP4A3	protein tyrosine phosphatase type IVA, member 3
17095566	1.64	SHC3	SHC (Src homology 2 domain containing) transforming protein 3
17115571	1.64	DNASE1L1	deoxyribonuclease I-like 1
16708419	1.63	KAZALD1	Kazal-type serine peptidase inhibitor domain 1
16774515	1.63	TPT1-AS1	TPT1 antisense RNA 1 (non-protein coding)
16848453	1.63	SLC39A11	solute carrier family 39 (metal ion transporter), member 11
16913486	1.63	VSTM2L	V-set and transmembrane domain containing 2 like
17091312	1.63	TMEM141	transmembrane protein 141
16908575	1.62	SLC23A3	solute carrier family 23 (nucleobase transporters), member 3
16945682	1.62	ACPP	acid phosphatase, prostate
17008428	1.62	ADCY10P1	adenylate cyclase 10 (soluble) pseudogene 1
16802102	1.61	RNU5B-1	RNA, U5B small nuclear 1
16834900	1.61	ACBD4	acyl-CoA binding domain containing 4
16846163	1.61	COPZ2	coatomer protein complex, subunit zeta 2
16865726	1.61	ZNF581	zinc finger protein 581
16953753	1.61	SLC25A20	solute carrier family 25 (carnitine/acylcarnitine translocase), member 20
16980160	1.61	INPP4B	inositol polyphosphate-4-phosphatase, type II, 105kDa
16707631	1.6	PLCE1	phospholipase C, epsilon 1
16768406	1.6	LUM	lumican
16769419	1.6	GLT8D2	glycosyltransferase 8 domain containing 2
16860992	1.6	CD22	CD22 molecule
17059355	1.6	SEMA3D	sema domain, immunoglobulin domain (Ig), short basic domain, secreted, (semaphorin) 3D
17090042	1.6	C9orf106	chromosome 9 open reading frame 106
16748477	1.59	CDKN1B	cyclin-dependent kinase inhibitor 1B (p27, Kip1)
16801122	1.59	TMOD2	tropomodulin 2 (neuronal)
17096383	1.59	XPA	xeroderma pigmentosum, complementation group A
16783675	1.58	CTAGE5	CTAGE family, member 5
16858435	1.58	CCDC159	coiled-coil domain containing 159
16883534	1.58	RPL31	ribosomal protein L31, TBC1 domain family, member 8 (with GRAM domain)
16892826	1.58	CXCR7	chemokine (C-X-C motif) receptor 7
16924143	1.58	TPTE	transmembrane phosphatase with tensin homology
17017746	1.58	PRRT1	proline-rich transmembrane protein 1
17074490	1.58	PPP1R3B	protein phosphatase 1, regulatory subunit 3B
16752044	1.57	MIR148B	microRNA 148b
16852308	1.57	SCARNA17	small Cajal body-specific RNA 17
16914888	1.57	MOCS3	molybdenum cofactor synthesis 3
17037609	1.57	SNORD32B	small nucleolar RNA, C/D box 32B
16669850	1.56	ITGA10	integrin, alpha 10
16699862	1.56	MIR4742	microRNA 4742
16704012	1.56	ZNF33A	zinc finger protein 33A
16762202	1.56	ST8SIA1	ST8 alpha-N-acetyl-neuraminide alpha-2,8-sialyltransferase 1
16836528	1.56	YPEL2	yippee-like 2 (Drosophila)
16861887	1.56	ECH1	enoyl CoA hydratase 1, peroxisomal
16864829	1.56	ZNF610	zinc finger protein 610
16883390	1.56	LIPT1	lipoyltransferase 1
16917810	1.56	LINC00261	long intergenic non-protein coding RNA 261
16941405	1.56	DNAH1	dynein, axonemal, heavy chain 1
16944559	1.56	ARGFX	arginine-fifty homeobox
16967875	1.56	PARM1	prostate androgen-regulated mucin-like protein 1
16672279	1.55	KIRREL	kin of IRRE like (Drosophila)
16693872	1.55	PBXIP1	pre-B-cell leukemia homeobox interacting protein 1
16826586	1.55	IRX3	iroquois homeobox 3
16868138	1.55	NDUFA7	NADH dehydrogenase (ubiquinone) 1 alpha subcomplex, 7, 14.5kDa
17009563	1.55	MIR206	microRNA 206
16706008	1.54	NUDT13	nudix (nucleoside diphosphate linked moiety X)-type motif 13
16835174	1.54	C17orf57	chromosome 17 open reading frame 57
16855127	1.54	SMAD7	SMAD family member 7
16862324	1.54	ITPKC	inositol-trisphosphate 3-kinase C
16875056	1.54	ZNF83	zinc finger protein 83
16970047	1.54	NDST3	N-deacetylase/N-sulfotransferase (heparan glucosaminyl) 3
17002846	1.54	DUSP1	dual specificity phosphatase 1
17011217	1.54	GRIK2	glutamate receptor, ionotropic, kainate 2
17021824	1.54	UFL1-AS1	UFL1 antisense RNA 1 (non-protein coding)
17073908	1.54	MFSD3	major facilitator superfamily domain containing 3
16751601	1.53	TENC1	tensin like C1 domain containing phosphatase (tensin 2)
16820528	1.53	HAS3	hyaluronan synthase 3
16829235	1.53	APRT	adenine phosphoribosyltransferase
16831306	1.53	HS3ST3B1	heparan sulfate (glucosamine) 3-O-sulfotransferase 3B1
16865062	1.53	MIR519D	microRNA 519d
16884441	1.53	ZC3H6	zinc finger CCCH-type containing 6
16890602	1.53	PKI55	DKFZp434H1419
16891830	1.53	FBXO36-IT1	FBXO36 intronic transcript 1 (non-protein coding)
16894335	1.53	ADAM17	ADAM metallopeptidase domain 17
16898567	1.53	GKN2	gastrokine 2
17015540	1.53	TFAP2A	transcription factor AP-2 alpha
17054439	1.53	TMEM184A	transmembrane protein 184A
17070492	1.53	ATP6V0D2	ATPase, H+ transporting, lysosomal 38kDa, V0 subunit d2
17099027	1.53	IER5L	immediate early response 5-like
17118236	1.53	HCG8	HLA complex group 8
16700195	1.52	C1orf145	chromosome 1 open reading frame 145
16814791	1.52	MAPK8IP3	mitogen-activated protein kinase 8 interacting protein 3
16858118	1.52	SNORD105	small nucleolar RNA, C/D box 105
16867657	1.52	PSPN	persephin
16975333	1.52	C4orf34	chromosome 4 open reading frame 34
16984772	1.52	SNX18	sorting nexin 18
17005223	1.52	ID4	inhibitor of DNA binding 4, dominant negative helix-loop-helix protein
17061127	1.52	RASA4	RAS p21 protein activator 4, RAS p21 protein activator 4B
17077341	1.52	SDR16C5	short chain dehydrogenase/reductase family 16C, member 5
17080342	1.52	TRPS1	trichorhinophalangeal syndrome I
17094814	1.52	TMEM2	transmembrane protein 2
16683445	1.51	FUCA1	fucosidase, alpha-L- 1, tissue
16717562	1.51	SEC31B	SEC31 homolog B (S. cerevisiae)
16728632	1.51	FOLR1	folate receptor 1 (adult)
16798160	1.51	SNORD116-12	small nucleolar RNA, C/D box 116-12
16840599	1.51	CLDN7	claudin 7
16859538	1.51	SLC27A1	solute carrier family 27 (fatty acid transporter), member 1
16876065	1.51	C19orf18	chromosome 19 open reading frame 18
16918679	1.51	EDEM2	ER degradation enhancer, mannosidase alpha-like 2
16921268	1.51	PTK6	PTK6 protein tyrosine kinase 6
17065064	1.51	ZNF596	zinc finger protein 596
17083614	1.51	LURAP1L	leucine rich adaptor protein 1-like
17106067	1.51	VSIG1	V-set and immunoglobulin domain containing 1
16724771	-1.51	OR8H2	olfactory receptor, family 8, subfamily H, member 2
16728889	-1.51	MRPL48	mitochondrial ribosomal protein L48
16740282	-1.51	CDCA5	cell division cycle associated 5
16755498	-1.51	TMPO	thymopoietin
16757636	-1.51	RNFT2	ring finger protein, transmembrane 2
16799598	-1.51	CASC5	cancer susceptibility candidate 5
16810572	-1.51	RBPMS2	RNA binding protein with multiple splicing 2
16815828	-1.51	CIITA	class II, major histocompatibility complex, transactivator
16816479	-1.51	CCP110	centriolar coiled coil protein 110kDa
16837191	-1.51	PITPNC1	phosphatidylinositol transfer protein, cytoplasmic 1
16883647	-1.51	IL1R1	interleukin 1 receptor, type I
16896320	-1.51	FAM98A	family with sequence similarity 98, member A
16971995	-1.51	RAPGEF2	Rap guanine nucleotide exchange factor (GEF) 2
17038792	-1.51	KIFC1	kinesin family member C1
17076538	-1.51	ADAM2	ADAM metallopeptidase domain 2
17084904	-1.51	MELK	maternal embryonic leucine zipper kinase
16670739	-1.52	MLLT11	myeloid/lymphoid or mixed-lineage leukemia; translocated to, 11
16762337	-1.52	BCAT1	branched chain amino-acid transaminase 1, cytosolic
16801557	-1.52	CCNB2	cyclin B2
16802519	-1.52	KIF23	kinesin family member 23
16859105	-1.52	SYDE1	synapse defective 1, Rho GTPase, homolog 1 (C. elegans)
16867784	-1.52	C3	complement component 3
16887840	-1.52	CDCA7	cell division cycle associated 7
16900152	-1.52	IGKV1-27	immunoglobulin kappa variable 1-27
16916958	-1.52	PCNA	proliferating cell nuclear antigen
16983373	-1.52	FAM105A	family with sequence similarity 105, member A
16996722	-1.52	CENPK	centromere protein K
17005396	-1.52	GMNN	geminin, DNA replication inhibitor
17044999	-1.52	MIR550A2	microRNA 550a-2
17056968	-1.52	MPLKIP	M-phase specific PLK1 interacting protein
17095936	-1.52	BICD2	bicaudal D homolog 2 (Drosophila)
17097914	-1.52	PHF19	PHD finger protein 19
17102230	-1.52	POLA1	polymerase (DNA directed), alpha 1, catalytic subunit
16736638	-1.53	E2F8	E2F transcription factor 8
16754471	-1.53	NAV3	neuron navigator 3
16808066	-1.53	TGM5	transglutaminase 5
16884372	-1.53	MERTK	c-mer proto-oncogene tyrosine kinase
16958812	-1.53	RUVBL1	RuvB-like 1 (E. coli)
17021845	-1.53	MMS22L	MMS22-like, DNA repair protein
17063828	-1.53	TRBV7-3	T cell receptor beta variable 7-3
17079338	-1.53	C8orf37	chromosome 8 open reading frame 37
17109820	-1.53	KLHL15	kelch-like 15 (Drosophila)
16662945	-1.54	MFSD2A	major facilitator superfamily domain containing 2A
16668622	-1.54	CHI3L2	chitinase 3-like 2
16685165	-1.54	CLSPN	claspin
16692724	-1.54	ANP32E	acidic (leucine-rich) nuclear phosphoprotein 32 family, member E
16701106	-1.54	CHML	choroideremia-like (Rab escort protein 2)
16707695	-1.54	HELLS	helicase, lymphoid-specific
16838977	-1.54	RAC3	ras-related C3 botulinum toxin substrate 3
16884582	-1.54	IL37	interleukin 37
16968314	-1.54	PRDM8	PR domain containing 8
17004989	-1.54	RNF182	ring finger protein 182
17067314	-1.54	SCARA3	scavenger receptor class A, member 3
17114478	-1.54	MMGT1	membrane magnesium transporter 1
16664118	-1.55	NASP	nuclear autoantigenic sperm protein (histone-binding)
16688961	-1.55	SSX2IP	synovial sarcoma, X breakpoint 2 interacting protein
16811299	-1.55	THAP10	THAP domain containing 10
16839345	-1.55	CRK	v-crk sarcoma virus CT10 oncogene homolog (avian)
16852008	-1.55	MOCOS	molybdenum cofactor sulfurase
16857136	-1.55	EBI3	Epstein-Barr virus induced 3
16916901	-1.55	RASSF2	Ras association (RalGDS/AF-6) domain family member 2
16917849	-1.55	THBD	thrombomodulin
16920671	-1.55	PMEPA1	prostate transmembrane protein, androgen induced 1
16934385	-1.55	MB	myoglobin
16953454	-1.55	UCN2	urocortin 2
16977058	-1.55	CXCL11	chemokine (C-X-C motif) ligand 11
16998810	-1.55	STARD4	StAR-related lipid transfer (START) domain containing 4
17061156	-1.55	FBXL13	F-box and leucine-rich repeat protein 13
17095043	-1.55	RFK	riboflavin kinase
16663958	-1.56	KIF2C	kinesin family member 2C
16677425	-1.56	CENPF	centromere protein F, 350/400kDa (mitosin)
16718769	-1.56	PDZD8	PDZ domain containing 8
16725041	-1.56	FAM111B	family with sequence similarity 111, member B
16773840	-1.56	BRCA2	breast cancer 2, early onset
16798801	-1.56	ARHGAP11B	Rho GTPase activating protein 11B
16939479	-1.56	ENTPD3	ectonucleoside triphosphate diphosphohydrolase 3
16943435	-1.56	CEP97	centrosomal protein 97kDa
16957568	-1.56	NAA50	N(alpha)-acetyltransferase 50, NatE catalytic subunit
17005276	-1.56	SOX4	SRY (sex determining region Y)-box 4
17005884	-1.56	OR2B6	olfactory receptor, family 2, subfamily B, member 6
17019208	-1.56	MRPS10	mitochondrial ribosomal protein S10
17058905	-1.56	YWHAG	tyrosine 3-monooxygenase/tryptophan 5-monooxygenase activation protein
17067755	-1.56	MAK16	MAK16 homolog (S. cerevisiae)
17084025	-1.56	FLJ35282	uncharacterized LOC441389
16698529	-1.57	NUCKS1	nuclear casein kinase and cyclin-dependent kinase substrate 1
16722720	-1.57	NAV2	neuron navigator 2
16846181	-1.57	CBX1	chromobox homolog 1
16846864	-1.57	MMD	monocyte to macrophage differentiation-associated
16880712	-1.57	SLC1A4	solute carrier family 1 (glutamate/neutral amino acid transporter), member 4
16927052	-1.57	CDC45	cell division cycle 45 homolog (S. cerevisiae)
16951306	-1.57	RFTN1	raftlin, lipid raft linker 1
16988801	-1.57	SLC12A2	solute carrier family 12 (sodium/potassium/chloride transporters), member 2
17007965	-1.57	KCTD20	potassium channel tetramerisation domain containing 20
17080595	-1.57	DSCC1	defective in sister chromatid cohesion 1 homolog (S. cerevisiae)
17107919	-1.57	ZNF185	zinc finger protein 185 (LIM domain)
16661192	-1.58	HMGN2	high mobility group nucleosomal binding domain 2
16773946	-1.58	RFC3	replication factor C (activator 1) 3, 38kDa
16871202	-1.58	RHPN2	rhophilin, Rho GTPase binding protein 2
16914315	-1.58	UBE2C	ubiquitin-conjugating enzyme E2C
16924966	-1.58	MIS18A	MIS18 kinetochore protein homolog A (S. pombe)
16968735	-1.58	HERC6	HECT and RLD domain containing E3 ubiquitin protein ligase family member 6
16980311	-1.58	OTUD4	OTU domain containing 4
16996545	-1.58	DEPDC1B	DEP domain containing 1B
17078916	-1.58	NBN	nibrin
17096931	-1.58	TMEM245	transmembrane protein 245
16679697	-1.59	NLRP3	NLR family, pyrin domain containing 3
16724061	-1.59	CD82	CD82 molecule
16901755	-1.59	BUB1	budding uninhibited by benzimidazoles 1 homolog (yeast)
16929064	-1.59	SMTN	smoothelin
16983848	-1.59	RAI14	retinoic acid induced 14
17052353	-1.59	AGK	acylglycerol kinase
17114713	-1.59	SPANXC	SPANX family, member C
16709537	-1.6	TRUB1	TruB pseudouridine (psi) synthase homolog 1 (E. coli)
16743721	-1.6	MMP1	matrix metallopeptidase 1 (interstitial collagenase)
16886285	-1.6	RNU7-2P	RNA, U7 small nuclear 2 pseudogene
16986417	-1.6	F2RL1	coagulation factor II (thrombin) receptor-like 1
17059756	-1.6	CDK6	cyclin-dependent kinase 6
17061972	-1.6	C7orf60	chromosome 7 open reading frame 60
17108959	-1.6	KAL1	Kallmann syndrome 1 sequence
16730976	-1.61	ZC3H12C	zinc finger CCCH-type containing 12C
16737105	-1.61	WT1	Wilms tumor 1
16774235	-1.61	SLC25A15	solute carrier family 25 (mitochondrial carrier; ornithine transporter) member 15
16995938	-1.61	C5orf34	chromosome 5 open reading frame 34
17096030	-1.61	FBP1	fructose-1,6-bisphosphatase 1
16659238	-1.62	TNFRSF1B	tumor necrosis factor receptor superfamily, member 1B, microRNA 4632
16755928	-1.62	PARPBP	PARP1 binding protein
16851810	-1.62	RNF138	ring finger protein 138, E3 ubiquitin protein ligase
17059776	-1.62	SAMD9L	sterile alpha motif domain containing 9-like
17087716	-1.62	SMC2	structural maintenance of chromosomes 2
16804778	-1.63	NGRN	neugrin, neurite outgrowth associated
16901957	-1.63	CKAP2L	cytoskeleton associated protein 2-like
16992122	-1.63	DOCK2	dedicator of cytokinesis 2
17015100	-1.63	MIR4645	microRNA 4645
17063233	-1.63	LUZP6	leucine zipper protein 6, myotrophin
16682016	-1.64	AGMAT	agmatine ureohydrolase (agmatinase)
16687418	-1.64	TMEM48	transmembrane protein 48
16697544	-1.64	ASPM	asp (abnormal spindle) homolog, microcephaly associated (Drosophila)
16707949	-1.64	C10orf12	chromosome 10 open reading frame 12
16723207	-1.64	DNAJC24	DnaJ (Hsp40) homolog, subfamily C, member 24
16828462	-1.64	TMEM170A	transmembrane protein 170A
16843131	-1.64	CRLF3	cytokine receptor-like factor 3
16871718	-1.64	ZNF850	zinc finger protein 850
16997404	-1.64	WDR41	WD repeat domain 41
16692583	-1.65	FAM72C	family with sequence similarity 72, member C
16750761	-1.65	TROAP	trophinin associated protein (tastin)
16771067	-1.65	CIT	citron (rho-interacting, serine/threonine kinase 21), microRNA 1178
16787679	-1.65	UBR7	ubiquitin protein ligase E3 component n-recognin 7 (putative)
16813342	-1.65	PRC1	protein regulator of cytokinesis 1
16874273	-1.65	TEAD2	TEA domain family member 2
16965346	-1.65	NCAPG	non-SMC condensin I complex, subunit G
16981219	-1.65	DDX60	DEAD (Asp-Glu-Ala-Asp) box polypeptide 60
16991760	-1.65	MIR3142	microRNA 3142
17104519	-1.65	RNY4P23	RNA, Ro-associated Y4 pseudogene 23
16679003	-1.66	GPR137B	G protein-coupled receptor 137B
16743104	-1.66	RAB38	RAB38, member RAS oncogene family
16842673	-1.66	SPAG5	sperm associated antigen 5
16880527	-1.66	B3GNT2	UDP-GlcNAc:betaGal beta-1,3-N-acetylglucosaminyltransferase 2
16943868	-1.66	ABHD10	abhydrolase domain containing 10
17046836	-1.66	MIR4650-1	microRNA 4650-1, microRNA 4650-2
16725049	-1.67	FAM111A	family with sequence similarity 111, member A
16730845	-1.67	ATM	ataxia telangiectasia mutated, nuclear protein, ataxia-telangiectasia locus
16912192	-1.67	GINS1	GINS complex subunit 1 (Psf1 homolog)
16946159	-1.67	MRAS	muscle RAS oncogene homolog
16987945	-1.67	CAMK4	calcium/calmodulin-dependent protein kinase IV
16677789	-1.68	BROX	BRO1 domain and CAAX motif containing
16722562	-1.68	SAA1	serum amyloid A1
16745693	-1.68	ESAM	endothelial cell adhesion molecule
16777384	-1.68	SACS	spastic ataxia of Charlevoix-Saguenay (sacsin)
16819539	-1.68	GPR56	G protein-coupled receptor 56
16889251	-1.68	SGOL2	shugoshin-like 2 (S. pombe)
16904780	-1.68	SPC25	SPC25, NDC80 kinetochore complex component, homolog (S. cerevisiae)
17005001	-1.68	CD83	CD83 molecule
16664243	-1.69	RAD54L	RAD54-like (S. cerevisiae)
16828886	-1.69	GINS2	GINS complex subunit 2 (Psf2 homolog)
16850477	-1.69	TYMS	thymidylate synthetase
17000439	-1.69	CDC25C	cell division cycle 25 homolog C (S. pombe)
17064939	-1.69	NCAPG2	non-SMC condensin II complex, subunit G2
16702571	-1.71	MCM10	minichromosome maintenance complex component 10
16724633	-1.71	PTPRJ	protein tyrosine phosphatase, receptor type, J
16745718	-1.71	ROBO4	roundabout, axon guidance receptor, homolog 4 (Drosophila)
16764758	-1.71	GALNT6	UDP-N-acetyl-alpha-D-galactosamine:polypeptide N-acetylgalactosaminyltransferase 6 (GalNAc-T6)
16844454	-1.71	KRT27	keratin 27
16922584	-1.71	CHAF1B	chromatin assembly factor 1, subunit B (p60)
16674953	-1.72	TSEN15	tRNA splicing endonuclease 15 homolog (S. cerevisiae)
16757347	-1.72	OAS3	2'-5'-oligoadenylate synthetase 3, 100kDa
16833476	-1.72	DHRS11	dehydrogenase/reductase (SDR family) member 11
16901974	-1.72	IL1A	interleukin 1, alpha
16673154	-1.73	NUF2	NUF2, NDC80 kinetochore complex component, homolog (S. cerevisiae)
16745281	-1.73	MCAM	melanoma cell adhesion molecule
16809506	-1.73	ARPP19	cAMP-regulated phosphoprotein, 19kDa
16826160	-1.73	SHCBP1	SHC SH2-domain binding protein 1
16861318	-1.73	WDR62	WD repeat domain 62
16877888	-1.73	EPT1	ethanolaminephosphotransferase 1 (CDP-ethanolamine-specific)
17052935	-1.73	OR2A20P	olfactory receptor, family 2, subfamily A, member 20 pseudogene
16715409	-1.74	DNAJC9	DnaJ (Hsp40) homolog, subfamily C, member 9
16736453	-1.74	SAA2	serum amyloid A2, serum amyloid A4, constitutive, SAA2-SAA4 readthrough
16751709	-1.74	ESPL1	extra spindle pole bodies homolog 1 (S. cerevisiae)
17007824	-1.74	FANCE	Fanconi anemia, complementation group E
17063480	-1.74	PARP12	poly (ADP-ribose) polymerase family, member 12
16697695	-1.75	KIF14	kinesin family member 14
16714504	-1.75	ZWINT	ZW10 interactor
16777777	-1.75	SLC7A1	solute carrier family 7 (cationic amino acid transporter, y+ system), member 1
16802497	-1.75	PAQR5	progestin and adipoQ receptor family member V
16840982	-1.75	MYH10	myosin, heavy chain 10, non-muscle
16969817	-1.75	C4orf32	chromosome 4 open reading frame 32
16991010	-1.75	SLC26A2	solute carrier family 26 (sulfate transporter), member 2
16755339	-1.76	ELK3	ELK3, ETS-domain protein (SRF accessory protein 2)
16830469	-1.76	CHRNB1	cholinergic receptor, nicotinic, beta 1 (muscle), fibroblast growth factor 11
17104484	-1.76	KIF4A	kinesin family member 4A
16660596	-1.77	EPHB2	EPH receptor B2
16793885	-1.77	RAB15	RAB15, member RAS oncogene family
16795819	-1.77	GPR68	G protein-coupled receptor 68
16803562	-1.78	CHRNA5	cholinergic receptor, nicotinic, alpha 5 (neuronal)
16889268	-1.78	AOX1	aldehyde oxidase 1
16932023	-1.78	MIR3198-1	microRNA 3198-1
17017947	-1.78	TAP2	transporter 2, ATP-binding cassette, sub-family B (MDR/TAP)
16793225	-1.79	DLGAP5	discs, large (Drosophila) homolog-associated protein 5
16991460	-1.79	KIF4B	kinesin family member 4B
17117110	-1.79	CD24	CD24 molecule
16691883	-1.8	FAM72D	family with sequence similarity 72, member D
16694617	-1.8	IQGAP3	IQ motif containing GTPase activating protein 3
16743262	-1.8	SLC36A4	solute carrier family 36 (proton/amino acid symporter), member 4
16920730	-1.8	APCDD1L	adenomatosis polyposis coli down-regulated 1-like
17039945	-1.8	TAP2	transporter 2, ATP-binding cassette, sub-family B (MDR/TAP)
16775056	-1.81	HNRNPA1L2	heterogeneous nuclear ribonucleoprotein A1-like 2
16830173	-1.81	FAM64A	family with sequence similarity 64, member A
16845410	-1.81	ETV4	ets variant 4
16951085	-1.81	FGD5-AS1	FGD5 antisense RNA 1 (non-protein coding)
17055804	-1.81	FAM126A	family with sequence similarity 126, member A
16710138	-1.82	DMBT1	deleted in malignant brain tumors 1
16800355	-1.82	WDR76	WD repeat domain 76
16996896	-1.82	CCDC125	coiled-coil domain containing 125
17096205	-1.82	ZNF367	zinc finger protein 367
17010941	-1.83	PM20D2	peptidase M20 domain containing 2
17111435	-1.83	WNK3	WNK lysine deficient protein kinase 3
16673043	-1.84	UHMK1	U2AF homology motif (UHM) kinase 1
16919508	-1.85	TOMM34	translocase of outer mitochondrial membrane 34
16942991	-1.85	ARL13B	ADP-ribosylation factor-like 13B
17059532	-1.85	SLC25A40	solute carrier family 25, member 40
17114774	-1.85	MIR891A	microRNA 891a
16773700	-1.86	B3GALTL	beta 1,3-galactosyltransferase-like
16977378	-1.86	TMEM150C	transmembrane protein 150C
17103907	-1.86	RN5S504	RNA, 5S ribosomal 504
16943452	-1.87	NXPE3	neurexophilin and PC-esterase domain family, member 3
16820592	-1.88	CYB5B	cytochrome b5 type B (outer mitochondrial membrane)
17044177	-1.88	IL6	interleukin 6 (interferon, beta 2)
16736847	-1.89	LIN7C	lin-7 homolog C (C. elegans)
16769865	-1.89	USP30-AS1	USP30 antisense RNA 1 (non-protein coding)
16800670	-1.89	PLDN	pallidin homolog (mouse)
17045291	-1.89	EPDR1	ependymin related protein 1 (zebrafish)
17075776	-1.89	PBK	PDZ binding kinase
16768854	-1.9	ELK3	ELK3, ETS-domain protein (SRF accessory protein 2)
16991757	-1.9	MIR146A	microRNA 146a
17108931	-1.91	HDHD1	haloacid dehalogenase-like hydrolase domain containing 1
16695741	-1.92	OLFML2B	olfactomedin-like 2B
17052685	-1.92	TRBC2	T cell receptor beta constant 2
16833204	-1.93	CCL2	chemokine (C-C motif) ligand 2
16950072	-1.93	FYTTD1	forty-two-three domain containing 1
17065173	-1.94	ARHGEF10	Rho guanine nucleotide exchange factor (GEF) 10
16852312	-1.95	SKA1	spindle and kinetochore associated complex subunit 1
16666392	-1.96	FAM73A	family with sequence similarity 73, member A
16788046	-1.96	C14orf129	chromosome 14 open reading frame 129
16881059	-1.96	MIR3126	microRNA 3126
16844585	-1.97	LOC730755	keratin associated protein 2-4-like, keratin associated protein 2-4
16961475	-1.98	EIF5A2	eukaryotic translation initiation factor 5A2
17108694	-1.98	CRLF2	cytokine receptor-like factor 2
16728227	-1.99	MYEOV	myeloma overexpressed (in a subset of t(11;14) positive multiple myelomas)
17081347	-2	TMEM71	transmembrane protein 71
16684310	-2.03	LAPTM5	lysosomal protein transmembrane 5
17044370	-2.04	RN5S228	RNA, 5S ribosomal 228
16755542	-2.05	APAF1	apoptotic peptidase activating factor 1
16668002	-2.06	FAM102B	family with sequence similarity 102, member B
16688864	-2.06	TTLL7	tubulin tyrosine ligase-like family, member 7
16697166	-2.06	EDEM3	ER degradation enhancer, mannosidase alpha-like 3
16952874	-2.06	CCR1	chemokine (C-C motif) receptor 1
16829618	-2.09	HIC1	hypermethylated in cancer 1
17109260	-2.09	PIGA	phosphatidylinositol glycan anchor biosynthesis, class A
16918011	-2.1	C20orf3	chromosome 20 open reading frame 3
17020019	-2.12	MCM3	minichromosome maintenance complex component 3
16991741	-2.13	PTTG1	pituitary tumor-transforming 1
16698984	-2.15	NEK2	NIMA (never in mitosis gene a)-related kinase 2
16987844	-2.17	MAN2A1	mannosidase, alpha, class 2A, member 1
16661429	-2.19	GPR3	G protein-coupled receptor 3
16781602	-2.23	RNASE3	ribonuclease, RNase A family, 3
16821541	-2.25	CRISPLD2	cysteine-rich secretory protein LCCL domain containing 2
16704516	-2.32	ANXA8L2	annexin A8-like 2
16988971	-2.34	CSF2	colony stimulating factor 2 (granulocyte-macrophage)
17083370	-2.45	PDCD1LG2	programmed cell death 1 ligand 2
16713762	-2.51	ANXA8L1	annexin A8-like 1, annexin A8, annexin A8-like 2
16704614	-2.59	ANXA8	annexin A8, annexin A8-like 1, annexin A8-like 2
17095307	-2.62	C9orf64	chromosome 9 open reading frame 64
16689384	-2.74	GBP4	guanylate binding protein 4
16952280	-2.82	SCN5A	sodium channel, voltage-gated, type V, alpha subunit
16782122	-2.87	TRAJ17	T cell receptor alpha joining 17, T cell receptor alpha constant
16723318	-3.02	PRRG4	proline rich Gla (G-carboxyglutamic acid) 4 (transmembrane)
17113346	-3.14	CHRDL1	chordin-like 1
17016043	-3.18	MBOAT1	membrane bound O-acyltransferase domain containing 1
16774053	-3.45	CCNA1	cyclin A1
16967771	-3.89	IL8	interleukin 8

## Sheet: 1B
Supplementary File 1B. Differentially expressed genes in sip53 MDA-MB-231 cells.
Transcript Cluster ID	Fold Change	Gene Symbol	Description
17059804	3.24	CALCR	calcitonin receptor
16669374	2.64	HSD3B1	hydroxy-delta-5-steroid dehydrogenase, 3 beta- and steroid delta-isomerase 1
16979587	2.4	CETN4P	centrin EF-hand protein 4, pseudogene
16889530	1.99	CDK15	cyclin-dependent kinase 15
17092862	1.99	IFNA13	interferon, alpha 13, interferon, alpha 1
16700872	1.96	LYST-IT1	LYST intronic transcript 1 (non-protein coding)
16843167	1.93	EVI2A	ecotropic viral integration site 2A
17048563	1.92	PEG10	paternally expressed 10
16784215	1.91	GPR137C	G protein-coupled receptor 137C
16667119	1.9	KIAA1107	KIAA1107
16705831	1.9	SLC29A3	solute carrier family 29 (nucleoside transporters), member 3
16750996	1.9	ASIC1	acid-sensing (proton-gated) ion channel 1
17046482	1.89	ZNF138	zinc finger protein 138
17083900	1.89	ACER2	alkaline ceramidase 2
16687914	1.88	CYP2J2	cytochrome P450, family 2, subfamily J, polypeptide 2
16917810	1.88	LINC00261	long intergenic non-protein coding RNA 261
16698038	1.87	SYT2	synaptotagmin II
16709795	1.87	NANOS1	nanos homolog 1 (Drosophila)
16792998	1.84	TXNDC16	thioredoxin domain containing 16
16683377	1.83	ID3	inhibitor of DNA binding 3, dominant negative helix-loop-helix protein
16692073	1.81	NUDT4P1	nudix (nucleoside diphosphate linked moiety X)-type motif 4 pseudogene 1
17059355	1.8	SEMA3D	sema domain, immunoglobulin domain (Ig), short basic domain, secreted, (semaphorin) 3D
16750974	1.79	AQP5	aquaporin 5
17021831	1.78	GPR63	G protein-coupled receptor 63
17052652	1.78	PRSS1	protease, serine, 1 (trypsin 1), protease, serine, 3 pseudogene 2
16996415	1.77	ACTBL2	actin, beta-like 2
16688332	1.76	DIRAS3	DIRAS family, GTP-binding RAS-like 3
16974830	1.76	PPARGC1A	peroxisome proliferator-activated receptor gamma, coactivator 1 alpha
16781462	1.75	RN5S380	RNA, 5S ribosomal 380
16667105	1.74	BTBD8	BTB (POZ) domain containing 8
16885135	1.74	INHBB	inhibin, beta B
16988423	1.74	PRR16	proline rich 16
16675323	1.73	RGS2	regulator of G-protein signaling 2, 24kDa
16721905	1.7	ADM	adrenomedullin
16891820	1.7	FBXO36	F-box protein 36
17070381	1.7	LRRCC1	leucine rich repeat and coiled-coil centrosomal protein 1
17013878	1.69	RN5S225	RNA, 5S ribosomal 225
16971966	1.68	FNIP2	folliculin interacting protein 2
17038059	1.68	MICA	MHC class I polypeptide-related sequence A
17096091	1.68	PTCH1	patched 1
16666545	1.67	LPHN2	latrophilin 2
16684194	1.67	TAF12	TAF12 RNA polymerase II, TATA box binding protein (TBP)-associated factor, 20kDa
16698766	1.67	YOD1	YOD1 OTU deubiquinating enzyme 1 homolog (S. cerevisiae)
16807324	1.67	BMF	Bcl2 modifying factor
16968521	1.67	MIR4451	microRNA 4451
17010273	1.67	KCNQ5-IT1	KCNQ5 intronic transcript 1 (non-protein coding)
16984730	1.66	FST	follistatin
17043843	1.66	TSPAN13	tetraspanin 13
17067410	1.66	FZD3	frizzled family receptor 3
17087109	1.66	MIR27B	microRNA 27b, chromosome 9 open reading frame 3
16769690	1.65	CMKLR1	chemokine-like receptor 1
16802771	1.65	BBS4	Bardet-Biedl syndrome 4
16971867	1.65	TMEM144	transmembrane protein 144
16872926	1.64	PSG5	pregnancy specific beta-1-glycoprotein 5
16970047	1.64	NDST3	N-deacetylase/N-sulfotransferase (heparan glucosaminyl) 3
16778611	1.63	CCDC122	coiled-coil domain containing 122
17042997	1.63	LFNG	LFNG O-fucosylpeptide 3-beta-N-acetylglucosaminyltransferase
16690036	1.61	FRRS1	ferric-chelate reductase 1
16851230	1.61	ANKRD20A5P	ankyrin repeat domain 20 family, member A5, pseudogene
16995890	1.61	HMGCS1	3-hydroxy-3-methylglutaryl-CoA synthase 1 (soluble)
16717272	1.6	LOXL4	lysyl oxidase-like 4
17012140	1.59	RN5S215	RNA, 5S ribosomal 215
17051626	1.59	MEST	mesoderm specific transcript homolog (mouse)
17104908	1.59	CHIC1	cysteine-rich hydrophobic domain 1
16963389	1.58	CEP19	centrosomal protein 19kDa
17021281	1.58	KIAA1009	KIAA1009
16683541	1.57	IL22RA1	interleukin 22 receptor, alpha 1
16702351	1.57	GATA3	GATA binding protein 3
16750323	1.57	RN5S361	RNA, 5S ribosomal 361
16842812	1.57	TLCD1	TLC domain containing 1
17005169	1.56	KDM1B	lysine (K)-specific demethylase 1B
16707343	1.55	HECTD2	HECT domain containing E3 ubiquitin protein ligase 2
16712435	1.55	C10orf114	chromosome 10 open reading frame 114
16803533	1.55	AGPHD1	aminoglycoside phosphotransferase domain containing 1
16987125	1.55	POLR3G	polymerase (RNA) III (DNA directed) polypeptide G (32kD)
16996684	1.55	ADAMTS6	ADAM metallopeptidase with thrombospondin type 1 motif, 6
17044302	1.55	CCDC126	coiled-coil domain containing 126
16677071	1.54	SERTAD4	SERTA domain containing 4
16809748	1.54	MNS1	meiosis-specific nuclear structural 1
16826586	1.54	IRX3	iroquois homeobox 3
16843162	1.54	EVI2B	ecotropic viral integration site 2B
16960149	1.54	PLSCR4	phospholipid scramblase 4
16986965	1.54	NBPF22P	neuroblastoma breakpoint family, member 22, pseudogene
17064020	1.54	OR2A7	olfactory receptor, family 2, subfamily A, member 7
17089003	1.54	OLFML2A	olfactomedin-like 2A
16698356	1.53	PIK3C2B	phosphoinositide-3-kinase, class 2, beta polypeptide
16808997	1.53	FAM227B	family with sequence similarity 227, member B
16864661	1.53	SIGLEC17P	sialic acid binding Ig-like lectin 17, pseudogene
16701092	1.52	OPN3	opsin 3
16774303	1.52	RGCC	regulator of cell cycle
16819252	1.52	MT1F	metallothionein 1F
16924602	1.52	ADAMTS1	ADAM metallopeptidase with thrombospondin type 1 motif, 1
16968488	1.52	WDFY3-AS2	WDFY3 antisense RNA 2 (non-protein coding)
17056289	1.52	MIR550A3	microRNA 550a-3
16723748	1.51	C11orf74	chromosome 11 open reading frame 74
16947603	1.51	MIR15B	microRNA 15b
16686774	-1.51	PDZK1IP1	PDZK1 interacting protein 1
16852354	-1.51	SMAD4	SMAD family member 4
16854713	-1.51	RPRD1A	regulation of nuclear pre-mRNA domain containing 1A
17006171	-1.51	ZNRD1	zinc ribbon domain containing 1
17013126	-1.51	GPR126	G protein-coupled receptor 126
17022388	-1.51	CD164	CD164 molecule, sialomucin
17040409	-1.51	ZNRD1	zinc ribbon domain containing 1
17084605	-1.51	UNC13B	unc-13 homolog B (C. elegans)
17108694	-1.51	CRLF2	cytokine receptor-like factor 2
16920730	-1.52	APCDD1L	adenomatosis polyposis coli down-regulated 1-like
17037693	-1.52	ZNRD1	zinc ribbon domain containing 1
16758427	-1.53	DENR	density-regulated protein
16782122	-1.53	TRAJ17	T cell receptor alpha joining 17, T cell receptor alpha constant
16795819	-1.53	GPR68	G protein-coupled receptor 68
16848739	-1.53	HN1	hematological and neurological expressed 1
16854540	-1.53	B4GALT6	UDP-Gal:betaGlcNAc beta 1,4- galactosyltransferase, polypeptide 6
16969729	-1.53	EGF	epidermal growth factor
17045838	-1.53	IGFBP1	insulin-like growth factor binding protein 1
16664445	-1.54	CMPK1	cytidine monophosphate (UMP-CMP) kinase 1, cytosolic
16738630	-1.54	LPXN	leupaxin
16825148	-1.54	RNU7-24P	RNA, U7 small nuclear 24 pseudogene
16977396	-1.54	SCD5	stearoyl-CoA desaturase 5
16784605	-1.55	NAA30	N(alpha)-acetyltransferase 30, NatC catalytic subunit
17007048	-1.55	C4A	complement component 4A (Rodgers blood group)
16980998	-1.56	C4orf46	chromosome 4 open reading frame 46
17035064	-1.56	ZNRD1	zinc ribbon domain containing 1
17041030	-1.56	C4B	complement component 4B (Chido blood group)
16828046	-1.57	PHLPP2	PH domain and leucine rich repeat protein phosphatase 2
16909319	-1.57	DNER	delta/notch-like EGF repeat containing
16961282	-1.57	PDCD10	programmed cell death 10
16977058	-1.57	CXCL11	chemokine (C-X-C motif) ligand 11
17006949	-1.57	CFB	complement factor B
16730503	-1.58	YAP1	Yes-associated protein 1
16938102	-1.58	EAF1	ELL associated factor 1
17067755	-1.58	MAK16	MAK16 homolog (S. cerevisiae)
16830146	-1.59	MIS12	MIS12, MIND kinetochore complex component, homolog (S. pombe)
16730522	-1.6	BIRC3	baculoviral IAP repeat containing 3
16867784	-1.6	C3	complement component 3
16880063	-1.6	ERLEC1	endoplasmic reticulum lectin 1
16918132	-1.6	NANP	N-acetylneuraminic acid phosphatase
16859795	-1.61	GDF15	growth differentiation factor 15
16870047	-1.61	SLC35E1	solute carrier family 35, member E1
16782754	-1.62	GMPR2	guanosine monophosphate reductase 2
16695602	-1.63	B4GALT3	UDP-Gal:betaGlcNAc beta 1,4- galactosyltransferase, polypeptide 3
16855697	-1.63	VPS4B	vacuolar protein sorting 4 homolog B (S. cerevisiae)
16867349	-1.63	SEMA6B	sema domain, transmembrane domain (TM), and cytoplasmic domain, (semaphorin) 6B
16904741	-1.63	STK39	serine threonine kinase 39
17114220	-1.63	MBNL3	muscleblind-like splicing regulator 3
16742086	-1.64	PGM2L1	phosphoglucomutase 2-like 1
16962264	-1.64	MAGEF1	melanoma antigen family F, 1
17097340	-1.64	INIP	INTS3 and NABP interacting protein
16705551	-1.65	HKDC1	hexokinase domain containing 1
17078610	-1.65	IMPA1	inositol(myo)-1(or 4)-monophosphatase 1
16685482	-1.66	YRDC	yrdC domain containing (E. coli)
16754471	-1.66	NAV3	neuron navigator 3
16847137	-1.66	2015-09-04	septin 4
16785127	-1.67	RHOJ	ras homolog family member J
16800871	-1.67	EID1	EP300 interacting inhibitor of differentiation 1
16991757	-1.67	MIR146A	microRNA 146a
16743483	-1.68	MTMR2	myotubularin related protein 2
16781573	-1.68	ANG	angiogenin, ribonuclease, RNase A family, 5, ribonuclease, RNase A family, 4
17102668	-1.68	ATP6AP2	ATPase, H+ transporting, lysosomal accessory protein 2
16704182	-1.69	CSGALNACT2	chondroitin sulfate N-acetylgalactosaminyltransferase 2
16977789	-1.69	KLHL8	kelch-like 8 (Drosophila)
17044054	-1.69	RNU1-15P	RNA, U1 small nuclear 15, pseudogene
17081002	-1.69	FAM84B	family with sequence similarity 84, member B
16884918	-1.7	INSIG2	insulin induced gene 2
16956002	-1.71	EOGT	EGF domain-specific O-linked N-acetylglucosamine (GlcNAc) transferase
17022588	-1.71	CDK19	cyclin-dependent kinase 19
16779855	-1.72	MYCBP2	MYC binding protein 2, E3 ubiquitin protein ligase
16858823	-1.72	NACC1	nucleus accumbens associated 1, BEN and BTB (POZ) domain containing
17000793	-1.72	CD14	CD14 molecule
17106822	-1.72	OCRL	oculocerebrorenal syndrome of Lowe
16787902	-1.73	SERPINA3	serpin peptidase inhibitor, clade A (alpha-1 antiproteinase, antitrypsin), member 3
16937252	-1.74	MTMR14	myotubularin related protein 14
16958786	-1.74	MGLL	monoglyceride lipase
16965527	-1.75	PI4K2B	phosphatidylinositol 4-kinase type 2 beta
16709386	-1.76	CASP7	caspase 7, apoptosis-related cysteine peptidase
16858137	-1.76	ICAM1	intercellular adhesion molecule 1
16932023	-1.76	MIR3198-1	microRNA 3198-1
16959505	-1.77	RN5S141	RNA, 5S ribosomal 141
16855358	-1.78	CCDC68	coiled-coil domain containing 68
16965377	-1.78	SLIT2	slit homolog 2 (Drosophila)
16743721	-1.79	MMP1	matrix metallopeptidase 1 (interstitial collagenase)
16915712	-1.82	SLCO4A1	solute carrier organic anion transporter family, member 4A1
17018993	-1.82	C6orf130	chromosome 6 open reading frame 130
16667498	-1.84	SNX7	sorting nexin 7
16767335	-1.84	CPM	carboxypeptidase M
16987008	-1.84	RASA1	RAS p21 protein activator (GTPase activating protein) 1
16736453	-1.86	SAA2	serum amyloid A2, serum amyloid A4, constitutive, SAA2-SAA4 readthrough
16807879	-1.86	TMEM87A	transmembrane protein 87A
16872640	-1.86	RABAC1	Rab acceptor 1 (prenylated)
16735639	-1.87	TMEM41B	transmembrane protein 41B
17081347	-1.88	TMEM71	transmembrane protein 71
16673043	-1.89	UHMK1	U2AF homology motif (UHM) kinase 1
16753533	-1.91	RASSF3	Ras association (RalGDS/AF-6) domain family member 3
16777549	-1.91	MTMR6	myotubularin related protein 6
17075553	-1.94	STC1	stanniocalcin 1
16694689	-1.95	NES	nestin
16761326	-1.96	KLRC4-KLRK1	KLRC4-KLRK1 readthrough, killer cell lectin-like receptor subfamily K, member 1
16833327	-2.04	SLFN5	schlafen family member 5
16785821	-2.05	SLC39A9	solute carrier family 39 (zinc transporter), member 9
16919158	-2.05	TGM2	transglutaminase 2 (C polypeptide, protein-glutamine-gamma-glutamyltransferase)
16979917	-2.06	SLC7A11	solute carrier family 7 (anionic amino acid transporter light chain, xc- system), member 11
17063073	-2.08	SLC35B4	solute carrier family 35, member B4
16699009	-2.1	LPGAT1	lysophosphatidylglycerol acyltransferase 1
16947357	-2.1	PTX3	pentraxin 3, long
16664708	-2.17	ZFYVE9	zinc finger, FYVE domain containing 9
16833204	-2.18	CCL2	chemokine (C-C motif) ligand 2
16886174	-2.18	KYNU	kynureninase
16977052	-2.21	CXCL10	chemokine (C-X-C motif) ligand 10
16668622	-2.23	CHI3L2	chitinase 3-like 2
16774053	-2.25	CCNA1	cyclin A1
16955456	-2.26	FAM116A	family with sequence similarity 116, member A
16988971	-2.49	CSF2	colony stimulating factor 2 (granulocyte-macrophage)
17003924	-2.49	GFPT2	glutamine-fructose-6-phosphate transaminase 2
16977912	-2.71	PIGY	phosphatidylinositol glycan anchor biosynthesis, class Y
16819539	-2.91	GPR56	G protein-coupled receptor 56
16840732	-3.48	TP53	tumor protein p53
16967771	-5.41	IL8	interleukin 8

## Sheet: 1C
Supplementary File 1C Genes regulated by both ATM and p53 in MDA-MB-231 cells.
Transcript Cluster ID	Fold change		Gene Symbol	Description
	siATM	Sip53
16683377	4.78	1.83	ID3	inhibitor of DNA binding 3, dominant negative helix-loop-helix protein
17059804	3.09	3.24	CALCR	calcitonin receptor
16781462	2.04	1.75	RN5S380	RNA, 5S ribosomal 380
17043843	1.97	1.66	TSPAN13	tetraspanin 13
16968521	1.89	1.67	MIR4451	microRNA 4451
16974830	1.86	1.76	PPARGC1A	peroxisome proliferator-activated receptor gamma, coactivator 1 alpha
16843167	1.82	1.93	EVI2A	ecotropic viral integration site 2A
16701092	1.73	1.52	OPN3	opsin 3
16984730	1.73	1.66	FST	follistatin
16705831	1.72	1.9	SLC29A3	solute carrier family 29 (nucleoside transporters), member 3
16750974	1.69	1.79	AQP5	aquaporin 5
16698356	1.68	1.53	PIK3C2B	phosphoinositide-3-kinase, class 2, beta polypeptide
17087109	1.67	1.66	MIR27B	microRNA 27b, chromosome 9 open reading frame 3
16971867	1.64	1.65	TMEM144	transmembrane protein 144
17059355	1.6		SEMA3D	sema domain, immunoglobulin domain (Ig), short basic domain, secreted, (semaphorin) 3D
		1.8
16917810	1.56	1.88	LINC00261	long intergenic non-protein coding RNA 261
16826586	1.55	1.54	IRX3	iroquois homeobox 3
16970047	1.54	1.64	NDST3	N-deacetylase/N-sulfotransferase (heparan glucosaminyl) 3
16867784	-1.52	-1.6	C3	complement component 3
16754471	-1.53	-1.66	NAV3	neuron navigator 3
16668622	-1.54	-2.23	CHI3L2	chitinase 3-like 2
16977058	-1.55	-1.57	CXCL11	chemokine (C-X-C motif) ligand 11
17067755	-1.56	-1.58	MAK16	MAK16 homolog (S. cerevisiae)
16743721	-1.6	-1.79	MMP1	matrix metallopeptidase 1 (interstitial collagenase)
16819539	-1.68	-2.91	GPR56	G protein-coupled receptor 56
16736453	-1.74	-1.86	SAA2	serum amyloid A2, serum amyloid A4, constitutive, SAA2-SAA4 readthrough
16795819	-1.77	-1.53	GPR68	G protein-coupled receptor 68
16932023	-1.78	-1.76	MIR3198-1	microRNA 3198-1
16920730	-1.8	-1.52	APCDD1L	adenomatosis polyposis coli down-regulated 1-like
16673043	-1.84	-1.89	UHMK1	U2AF homology motif (UHM) kinase 1
16991757	-1.9	-1.67	MIR146A	microRNA 146a
16833204	-1.93	-2.18	CCL2	chemokine (C-C motif) ligand 2
17108694	-1.98	-1.51	CRLF2	cytokine receptor-like factor 2
17081347	-2	-1.88	TMEM71	transmembrane protein 71
16988971	-2.34	-2.49	CSF2	colony stimulating factor 2 (granulocyte-macrophage)
16782122	-2.87	-1.53	TRAJ17	T cell receptor alpha joining 17, T cell receptor alpha constant
16774053	-3.45	-2.25	CCNA1	cyclin A1
16967771	-3.89	-5.41	IL8	interleukin 8
